# Supplementary material for: Three-dimensional metal–organic framework derived porous CoP3 concave polyhedrons as superior bifunctional electrocatalysts for the evolution of hydrogen and oxygen
Source: Royal Society of Chemistry journal article supplement (doi:10.1039/c6cp07294a), 2016-12-14
Supplement: c6cp07294a1.pdf [file c6cp07294a1.pdf]

## **Electronic supplementary information**

### **Three dimensional metal-organic framework derived porous CoP<sub>3</sub> concave polyhedrons as superior bifunctional electrocatalysts for the evolution of hydrogen and oxygen**

Tianli Wu,<sup>a</sup> Mingyu Pi,<sup>a</sup> Xiaodeng Wang,<sup>a</sup> Dingke Zhang<sup>b</sup> and Shijian Chen<sup>a,\*</sup>

<sup>a</sup>School of Physics, Chongqing University, Chongqing, 401331, China

<sup>b</sup>College of Physics and Electronic Engineering, Chongqing Normal University, Chongqing, 401331, China

\*Corresponding author: Dr. Shijian Chen, E-mail: [sjchen@cqu.edu.cn](mailto:sjchen@cqu.edu.cn), Tel: +86-2365678362

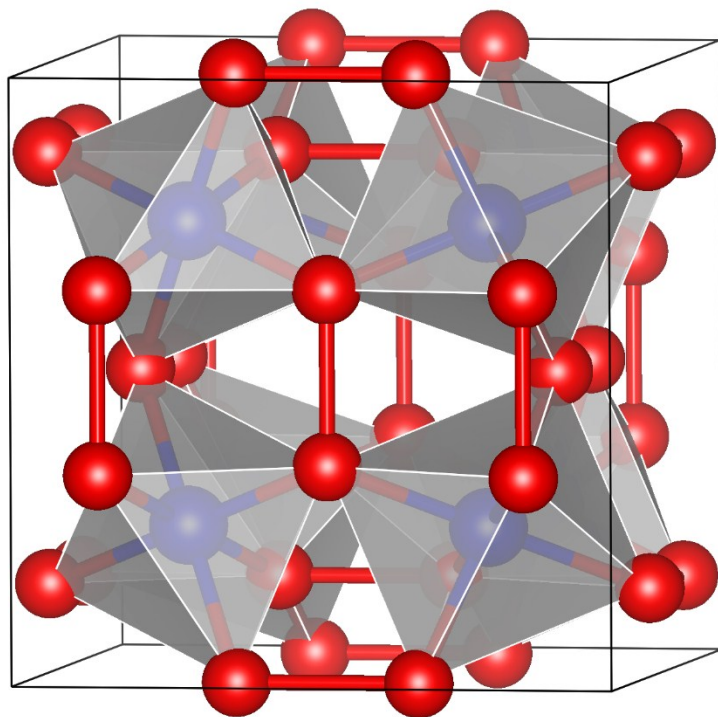

**Fig. S1** Crystal structure of CoP<sub>3</sub>. The cobalt and phosphorus atoms are represented by blue and red, respectively.

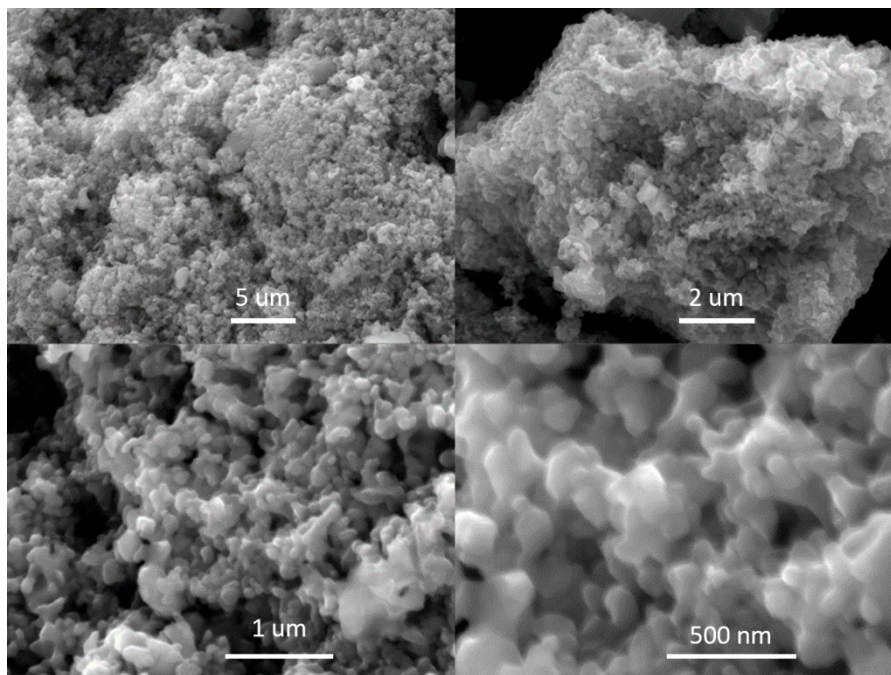

**Fig. S2** Low- and high- magnification SEM images of CoP<sub>3</sub> NPs.

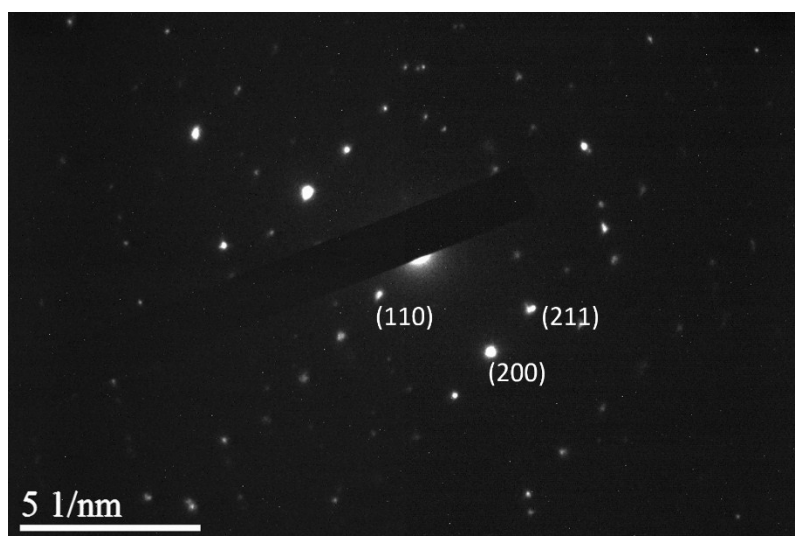

**Fig. S3** SAED pattern of CoP<sub>3</sub> CPs.

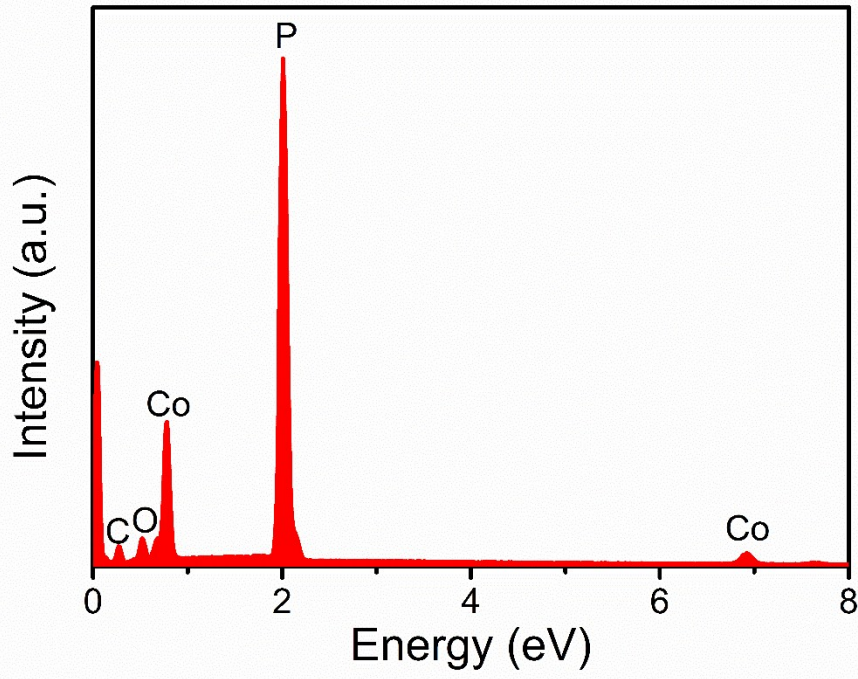

**Fig. S4** EDX spectrum of  $\text{CoP}_3$  CPs.

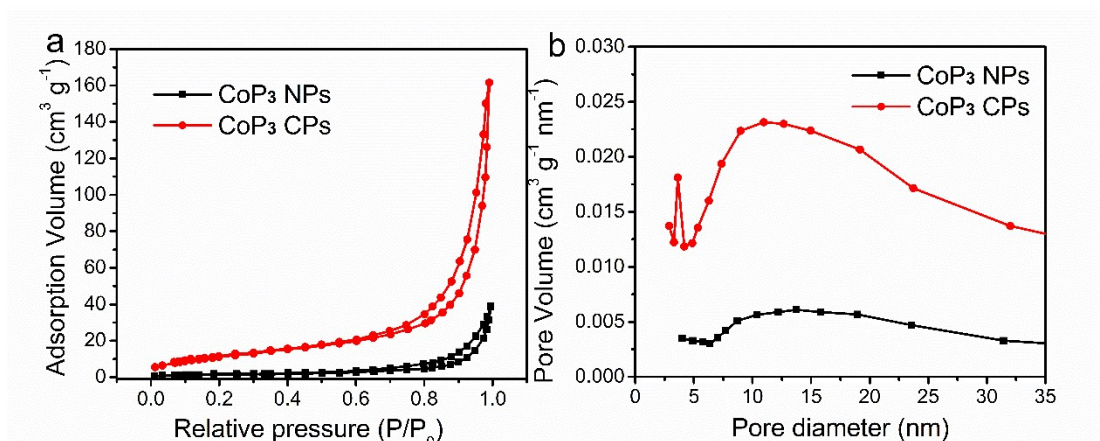

**Fig. S5** (a) Nitrogen adsorption/desorption isotherm and (b) the BJH pore-size distribution curve of CoP<sub>3</sub> NPs and CoP<sub>3</sub> CPs.

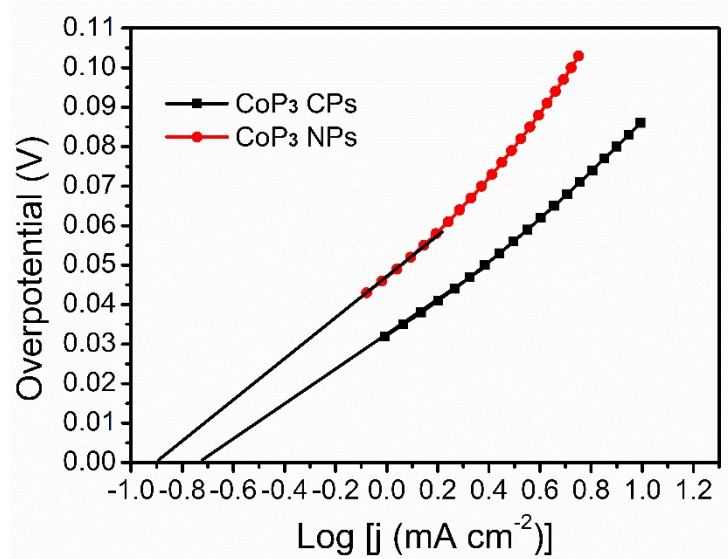

**Fig. S6** Calculated exchange current density of the CoP<sub>3</sub> CPs and CoP<sub>3</sub> NPs by applying extrapolation method to the Tafel plot.

**Table S1.** Comparison of HER performance in acid media for CoP<sub>3</sub> CPs/CFP with other TMPs HER electrocatalysts.

| Catalyst                    | Onset $\eta$ (mV) | Current density ( $j$ , mA cm <sup>-2</sup> ) | $\eta$ at the corresponding $j$ (mV) | Exchange current density (mA cm <sup>-2</sup> ) | Ref.                                           |
|-----------------------------|-------------------|-----------------------------------------------|--------------------------------------|-------------------------------------------------|------------------------------------------------|
| FeP nanosheets              | 100               | 10                                            | 240                                  | -                                               | <i>Chem. Commun.</i> , 2013, 49, 6656          |
| FeP NWs/Ti                  | 38                | 10                                            | 55                                   | 0.42                                            | <i>Angew. Chem. Int. Ed.</i> , 2014, 53, 12855 |
| FeP NWs                     | -                 | 10                                            | 96                                   | 0.17                                            | <i>Chem. Commun.</i> , 2016, 52, 2819.         |
| FeP NPs                     | 38                | 10                                            | 112                                  | -                                               | <i>Nanoscale</i> , 2015, 7, 4400               |
| FeP NAs                     | -                 | 10                                            | 85                                   | -                                               | <i>J. Mater. Chem. A</i> , 2014, 2, 17263      |
| FeP <sub>2</sub> /C         | -                 | 5                                             | 500                                  | 1.75*10 <sup>-3</sup>                           | <i>J. Mater. Chem. A</i> , 2015, 3, 499        |
| Ni <sub>2</sub> P NPs       | -                 | 20                                            | 130                                  | 2.7*10 <sup>-3</sup>                            | <i>J. Am. Chem. Soc.</i> , 2013, 135, 9267     |
| Ni <sub>2</sub> P/graphene  | 37                | 10                                            | 102                                  | 0.049                                           | <i>J. Power Sources</i> , 2015, 297, 45        |
| Ni <sub>2</sub> P/CNs       | 40                | 10                                            | 92                                   | -                                               | <i>J. Power Sources</i> , 2015, 285, 169       |
| NiP <sub>2</sub> /CC        | -                 | 10                                            | 116                                  | 0.26                                            | <i>Nanoscale</i> , 2014, 6, 13440              |
| Se doped NiP <sub>2</sub>   | -                 | 10                                            | 84                                   | -                                               | <i>ACS Catal.</i> , 2015, 5, 6355              |
| Cu <sub>3</sub> P NWs       | 62                | 10                                            | 143                                  | 0.18                                            | <i>Angew. Chem. Int. Ed.</i> , 2014, 53, 9577  |
| MoP Bulk                    | 50                | 30                                            | 180                                  | 0.034                                           | <i>Energy Environ. Sci.</i> , 2014, 7, 2624    |
| MoP NPs                     | 40                | 10                                            | 125                                  | 0.086                                           | <i>Adv. Mater.</i> , 2014, 26, 5702            |
| MoP <sub>2</sub> NPs/Mo     | -                 | 10                                            | 143                                  | 0.06                                            | <i>Nanoscale</i> , 2016, 8, 8500               |
| MoP <sub>2</sub> nanosheets | -                 | 10                                            | 58                                   | -                                               | <i>J. Mater. Chem. A</i> , 2016, 4, 7169       |
| WP                          | 50                | 10                                            | 120                                  | -                                               | <i>Chem. Commun.</i> , 2014, 50, 11026         |



|                           |    |          |           |       |                                               |
|---------------------------|----|----------|-----------|-------|-----------------------------------------------|
| $\alpha$ -WP <sub>2</sub> | 54 | 10       | 161       | 0.017 | <i>ACS Catal.</i> , 2015, 5, 145              |
| $\beta$ -WP <sub>2</sub>  | 56 | 10       | 148       | 0.013 | <i>J. Power Sources</i> , 2015, 278, 540      |
| Co <sub>2</sub> P         | -  | 10       | 95        | -     | <i>Chem. Mater.</i> , 2015, 27, 3769          |
| CoP/CC                    | 38 | 10       | 67        | 0.288 | <i>J. Am. Chem. Soc.</i> , 2014, 136, 7587    |
| CoP NPs                   | -  | 20       | 85        | -     | <i>Angew. Chem. Int. Ed.</i> , 2014, 53, 5427 |
| CoP/CNs                   | 40 | 10       | 122       | 0.13  | <i>Angew. Chem. Int. Ed.</i> , 2014, 53, 6710 |
| CoP <sub>3</sub> CPs      | 30 | 10<br>50 | 78<br>127 | 0.209 | This work                                     |

NPs (Nanoparticles); CNs (Carbon Nanotubes); CC (Carbon Cloth); NWs (Nanowires); NAs (Nanoneedle Arrays); CPs (Concave Polyhedrons)

**Table S2.** Comparison of HER performance in neutral media for CoP<sub>3</sub> CPs/CFP with other HER electrocatalysts.

| Catalyst                    | Current density ( $j$ , mA cm <sup>-2</sup> ) | Potential at the corresponding $j$ (mV) | Ref.                                                 |
|-----------------------------|-----------------------------------------------|-----------------------------------------|------------------------------------------------------|
| Mo <sub>2</sub> B           | 1                                             | 250                                     | <i>Angew. Chem. Int. Ed.</i> , 2012, 51, 12703       |
| Mo <sub>2</sub> C           | 1                                             | 200                                     | <i>Angew. Chem. Int. Ed.</i> , 2012, 51, 12703       |
| H <sub>2</sub> -CoCat/FTO   | 2                                             | 385                                     | <i>Nat. Mater.</i> , 2012, 11, 802                   |
| Co-S/FTO                    | 2                                             | 83                                      | <i>J. Am. Chem. Soc.</i> , 2013, 135, 17699          |
| CuMoS <sub>4</sub>          | 2                                             | 210                                     | <i>Energy Environ. Sci.</i> , 2012, 5, 8912          |
| WP                          | 10                                            | 200                                     | <i>ACS Appl. Mater. Interfaces</i> , 2014, 6, 218740 |
| WP <sub>2</sub>             | 10                                            | 298                                     | <i>J. Power Sources</i> , 2015, 278, 540             |
| MoP <sub>2</sub> NPs/Mo     | 10                                            | 211                                     | <i>Nanoscale</i> , 2016, 8, 8500                     |
| MoP <sub>2</sub> nanosheets | 10                                            | 67                                      | <i>J. Mater. Chem. A</i> , 2016, 4, 7169             |
| CoP NWs                     | 2                                             | 65                                      | <i>J. Am. Chem. Soc.</i> , 2014, 136, 7587           |
| CoP <sub>3</sub> CPs        | 10                                            | 179                                     | This work                                            |

**Table S3.** Comparison of HER performance in alkaline media for CoP<sub>3</sub>/CFP with other HER electrocatalysts.

| Catalyst                    | Current density ( $j$ , mA cm <sup>-2</sup> ) | Potential at the corresponding $j$ (mV) | Ref.                                                 |
|-----------------------------|-----------------------------------------------|-----------------------------------------|------------------------------------------------------|
| Ni wire                     | 10                                            | 350                                     | <i>ACS Catal.</i> , 2013, 3, 166                     |
| MoB                         | 10                                            | 225                                     | <i>Angew. Chem. Int. Ed.</i> , 2012, 51, 12703       |
| NiP <sub>2</sub>            | 10                                            | 102                                     | <i>Nanoscale</i> , 2014, 6, 13440                    |
| WP                          | 10                                            | 250                                     | <i>ACS Appl. Mater. Interfaces</i> , 2014, 6, 218740 |
| WP <sub>2</sub>             | 10                                            | 225                                     | <i>J. Power Sources</i> , 2014, 136, 7587            |
| MoP <sub>2</sub> nanosheets | 10                                            | 85                                      | <i>J. Mater. Chem. A</i> , 2016, 4, 7169             |
| MoP <sub>2</sub> NPs/Mo     | 10                                            | 194                                     | <i>Nanoscale</i> , 2016, 8, 8500                     |
| CoP nanowires               | 10                                            | 209                                     | <i>J. Am. Chem. Soc.</i> , 2014, 136, 7587           |
| CoP <sub>3</sub> CPs        | 10                                            | 124                                     | This work                                            |

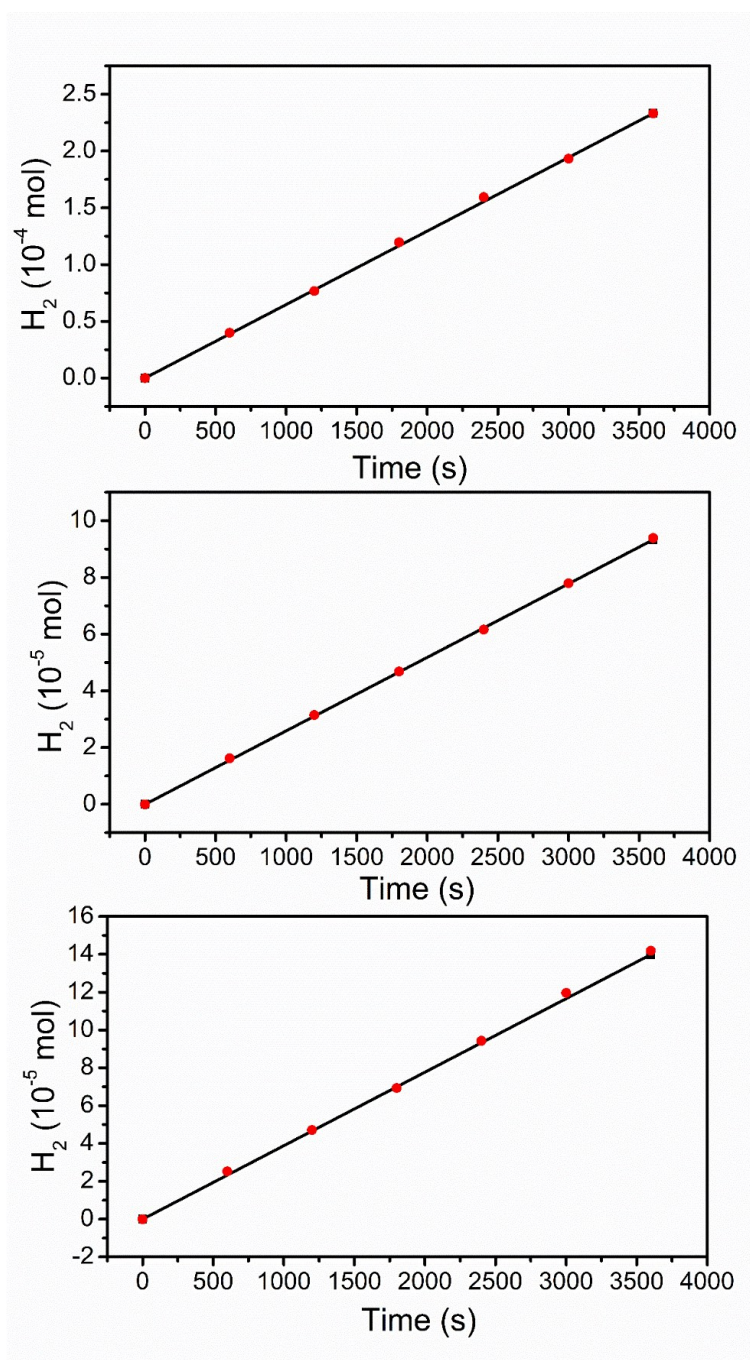

**Fig. S7** The amount of H<sub>2</sub> theoretically calculated (solid) and experimentally measured (red sphere) versus time for CoP<sub>3</sub> CPs at (a) pH 0 under an overpotential of 127 mV (50 mA cm<sup>-2</sup>) for 60 min, (b) pH 6.8 under overpotentials of 223 mV (20 mA cm<sup>-2</sup>) for 60 min. and (c) pH 14 under overpotentials of 173 mV (30 mA cm<sup>-2</sup>) for 60 min.

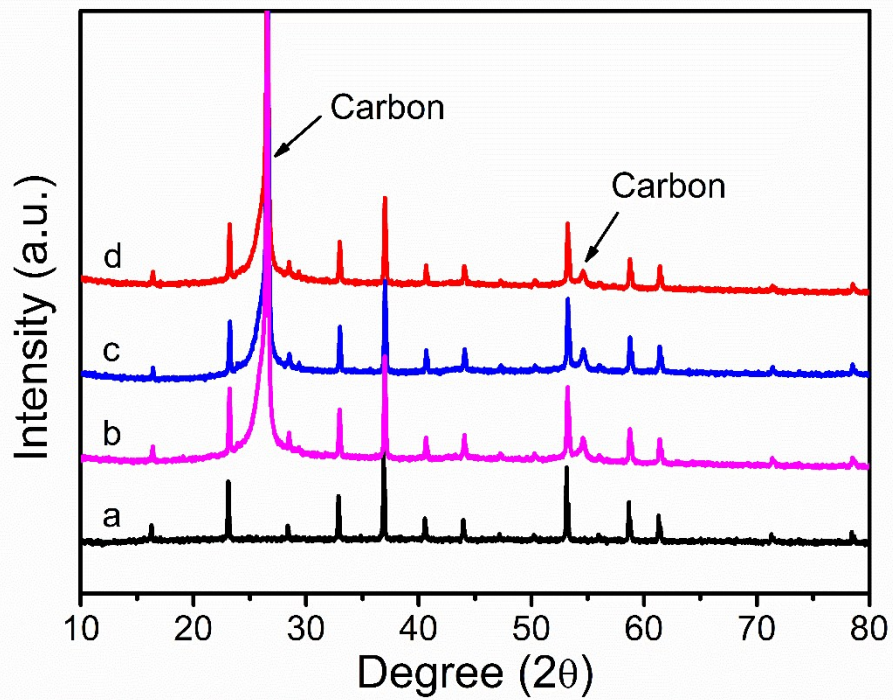

**Fig. S8** (a) XRD patterns of  $\text{CoP}_3$  CPs and (b), (c), (d) the XRD patterns of  $\text{CoP}_3$  CPs/CFP electrode after 3000 cycles CV scanning at pH 0, pH 6.8, and pH 14, respectively.

**Table S4.** Comparison of OER performance in alkaline media for CoP<sub>3</sub>/CFP with other OER electrocatalysts.

| Catalyst                             | Current density<br>( <i>j</i> mA cm <sup>-2</sup> ) | Potential at the<br>corresponding <i>j</i><br>(mV) | Ref                                                |
|--------------------------------------|-----------------------------------------------------|----------------------------------------------------|----------------------------------------------------|
| NiOOH/Ni <sub>5</sub> P <sub>4</sub> | 10                                                  | 290                                                | <i>Angew. Chem. Int. Ed.</i> , 2015, 54, 12361     |
| Ni-P/CF                              | 10                                                  | 325                                                | <i>J. Power Sources</i> , 2015, 299, 342           |
| Co-P film                            | 10                                                  | 345                                                | <i>Angew. Chem. Int. Ed.</i> , 2015, 54, 6251      |
| CoP NPs                              | 10                                                  | 360                                                | <i>ACS Catal.</i> , 2015, 5, 4066                  |
| CoP nanorods                         | 10                                                  | 320                                                | <i>ACS Catal.</i> , 2015, 5, 6874                  |
| CoP hollow                           | 10                                                  | 427                                                | <i>ACS Appl. Mater. Interfaces</i> , 2016, 8, 2158 |
| CoP <sub>2</sub> /RGO                | 10                                                  | 300                                                | <i>J. Mater. Chem. A</i> , 2016, 4, 4686           |
| CoP <sub>3</sub> NAs/CFP             | 10                                                  | 343                                                | This work                                          |
|                                      | 30                                                  | 393                                                |                                                    |



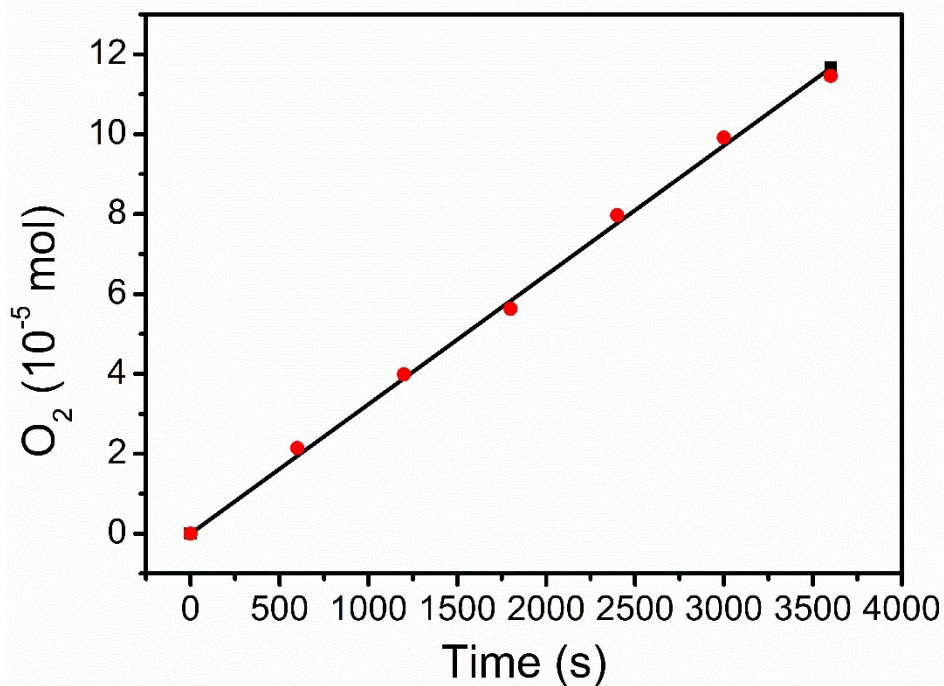

**Fig. S9** The amount of O<sub>2</sub> theoretically calculated (solid) and experimentally measured (red sphere) versus time for the CoP<sub>3</sub> CPs at pH 14 under overpotentials of 420 mV (50 mA cm<sup>-2</sup>) for 60 min.

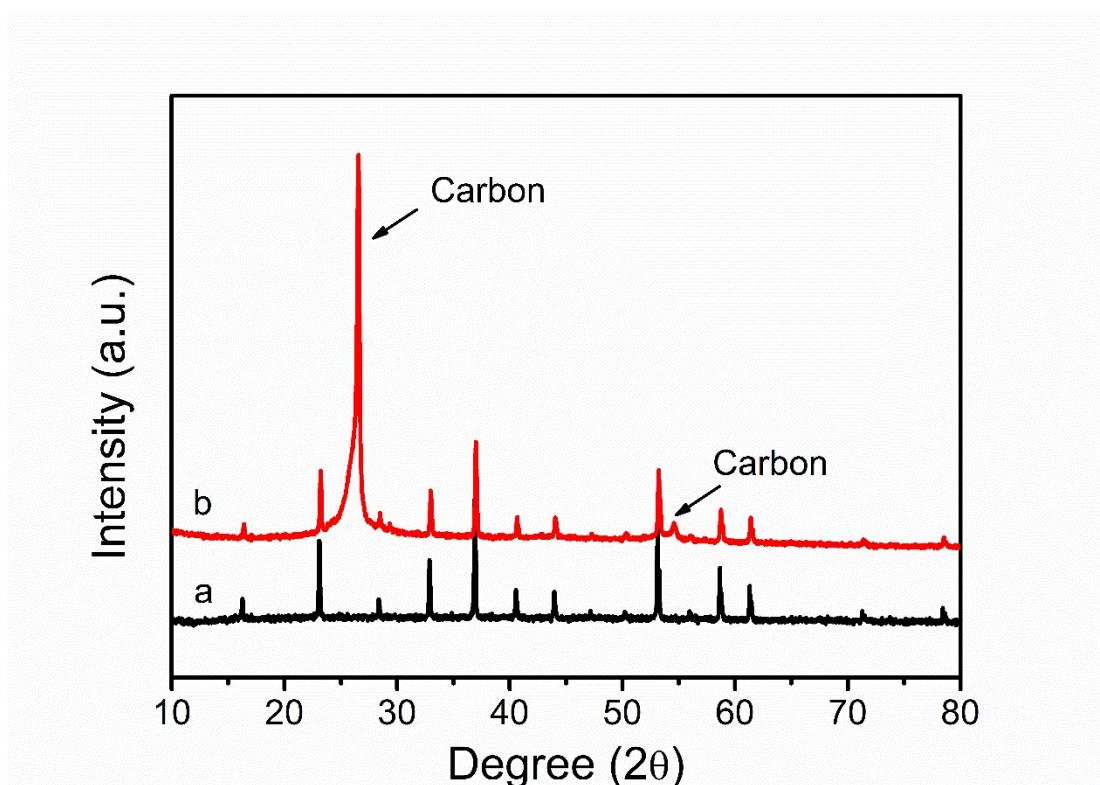

**Fig. S10** (a) XRD patterns of CoP<sub>3</sub> CPs and (b) the XRD patterns of CoP<sub>3</sub>

CPs/CFP electrode after 3000 cycles CV scanning at pH 14.
